# Supplementary material
Source: PubMed Central journal article supplement (PMC3792657)

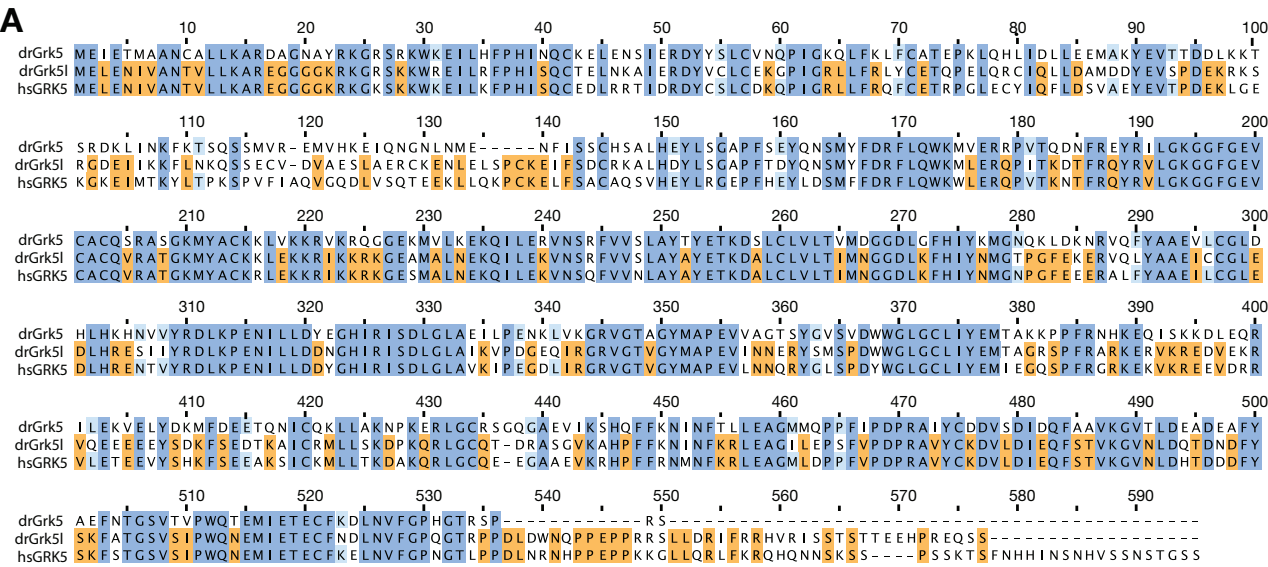

**B**

|                     |      | <i>Danio rerio</i> |         |         |
|---------------------|------|--------------------|---------|---------|
|                     |      | Grk2/3             | Grk5    | Grk5l   |
| <i>Homo sapiens</i> | GRK2 | 85 (97)            | 35 (65) | 35 (65) |
|                     | GRK3 | 91 (98)            | 36 (65) | 36 (65) |
|                     | GRK5 | 35 (65)            | 58 (85) | 74 (91) |

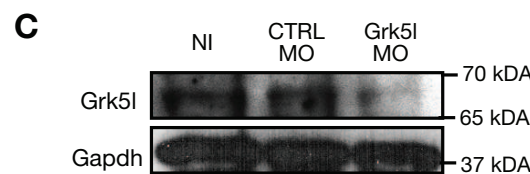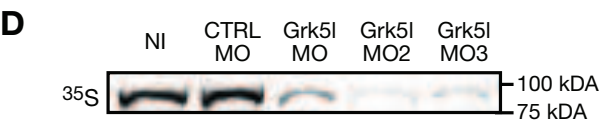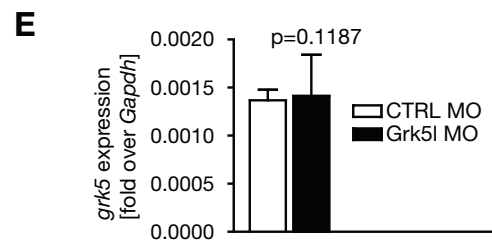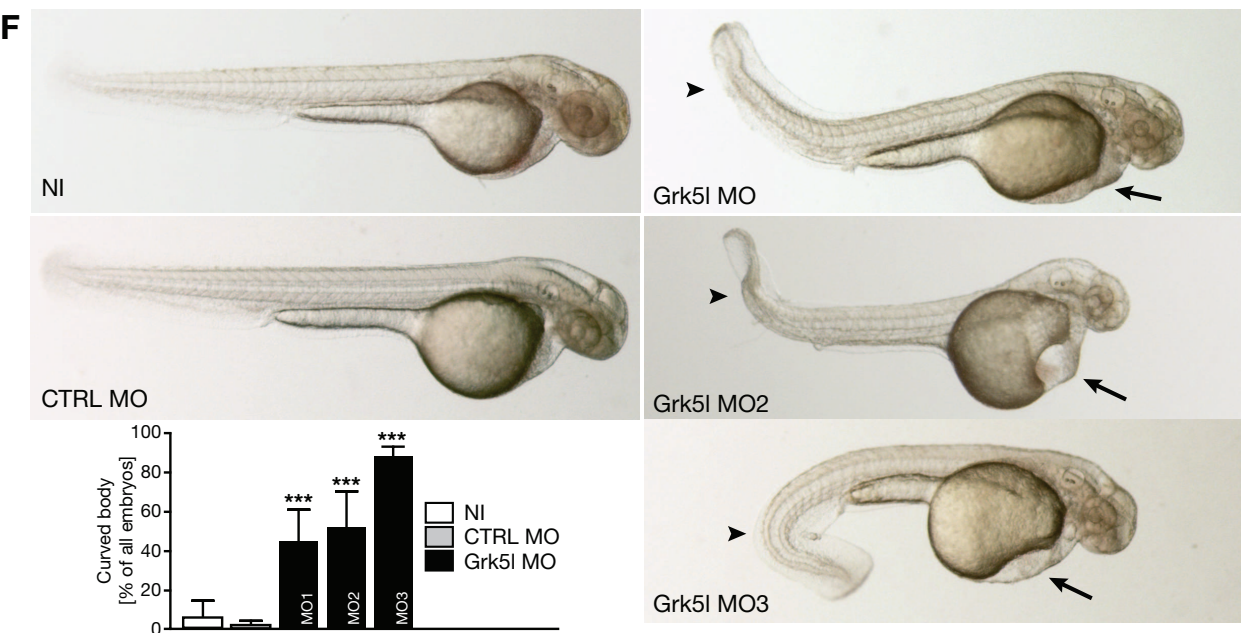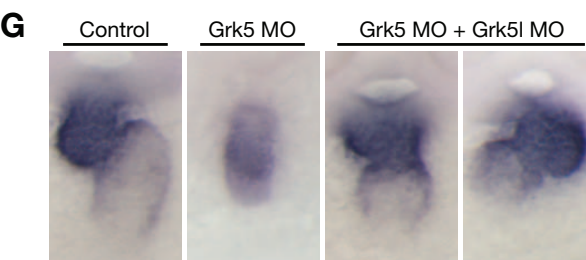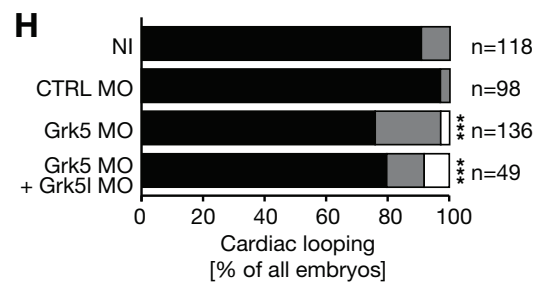

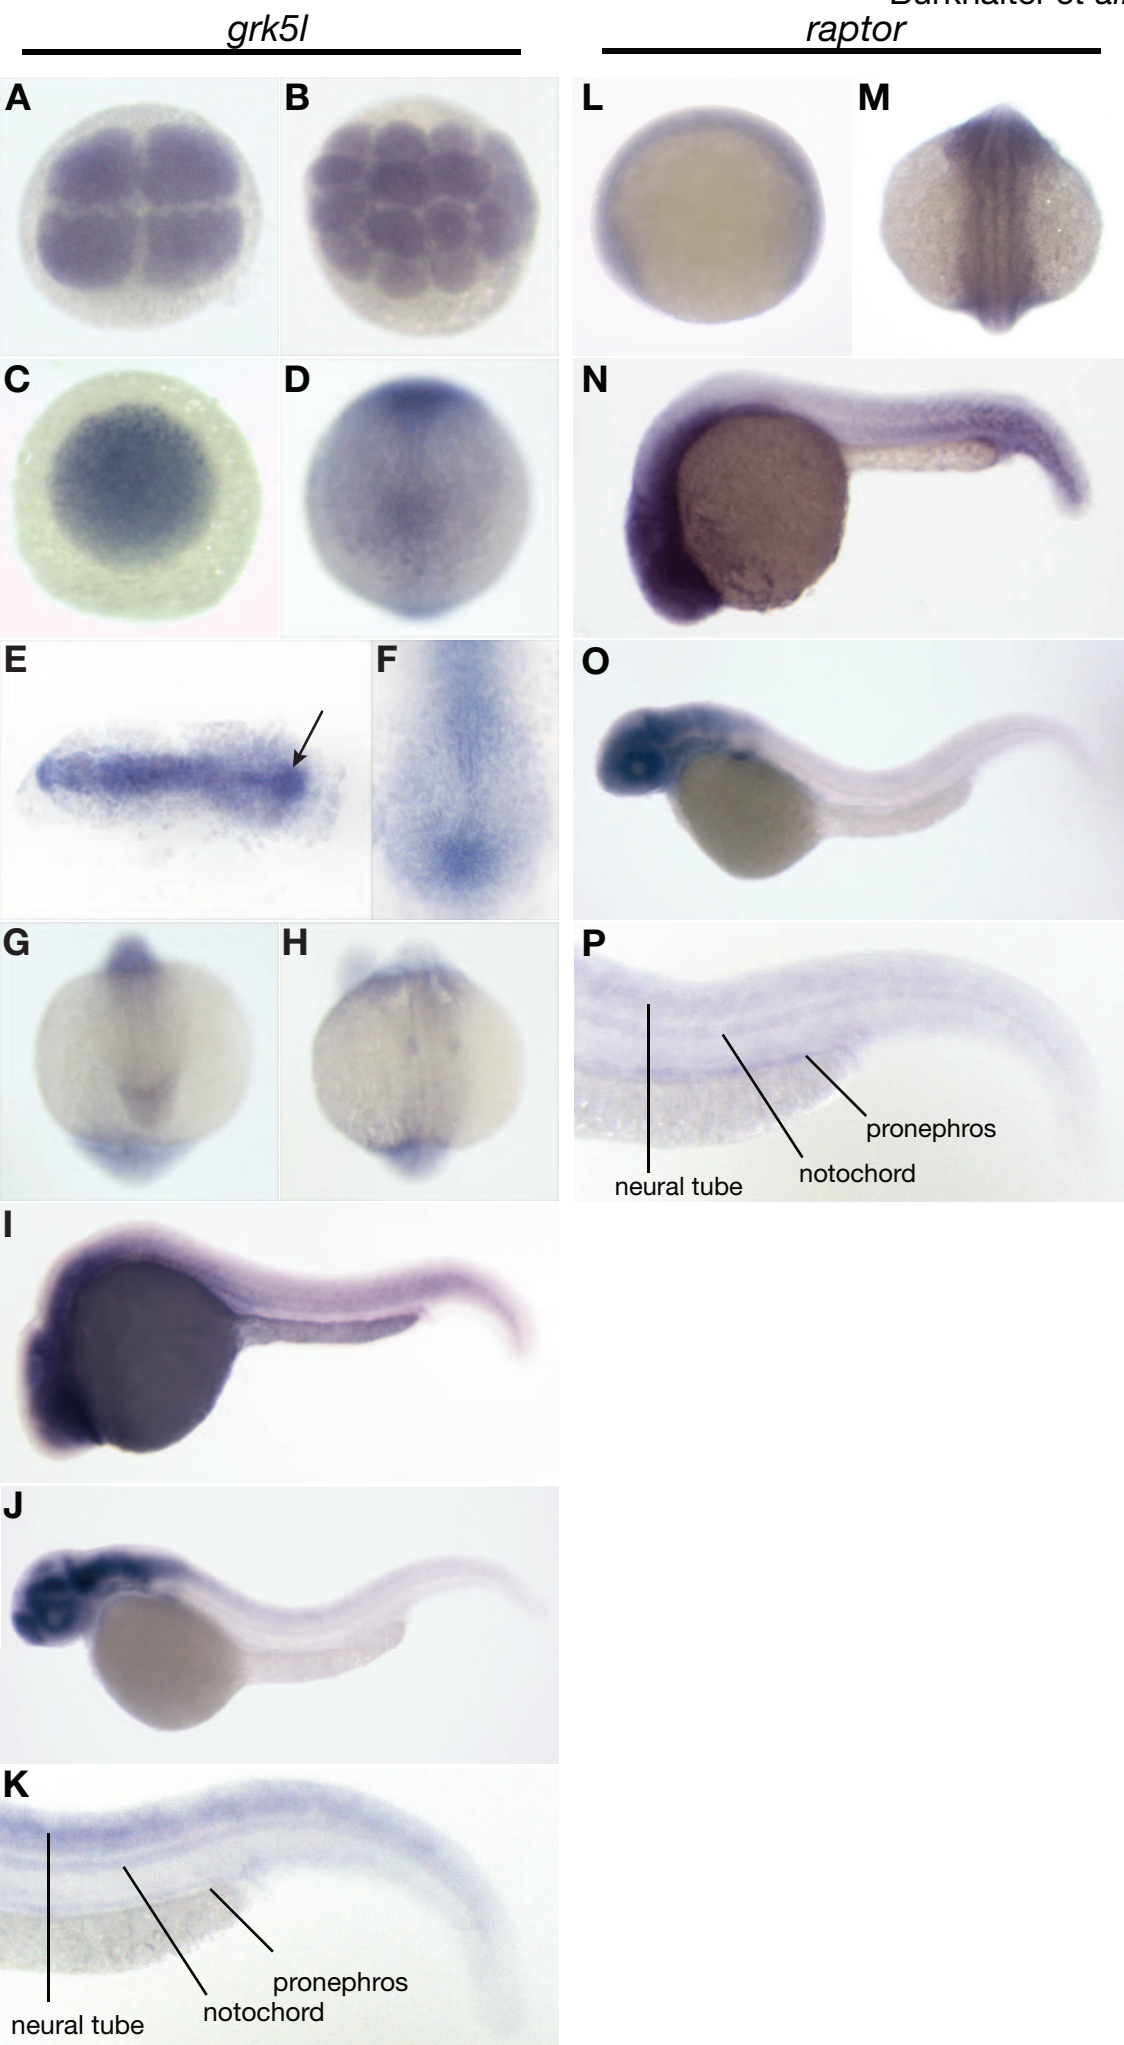

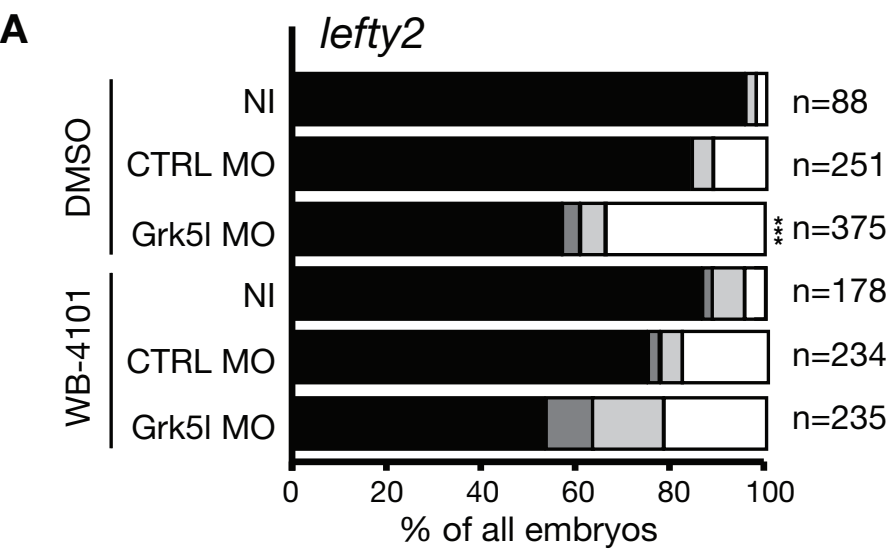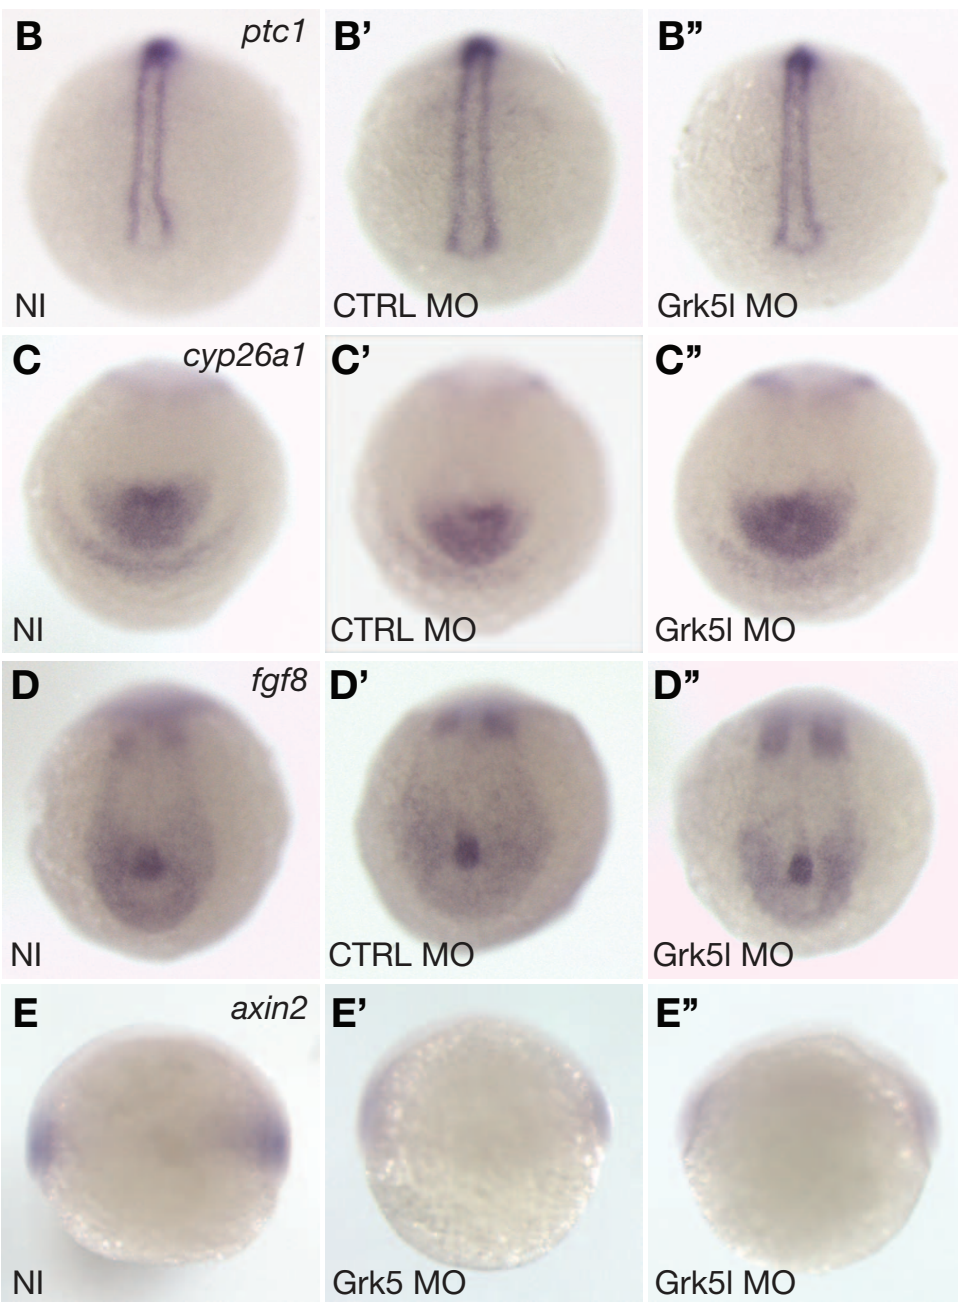

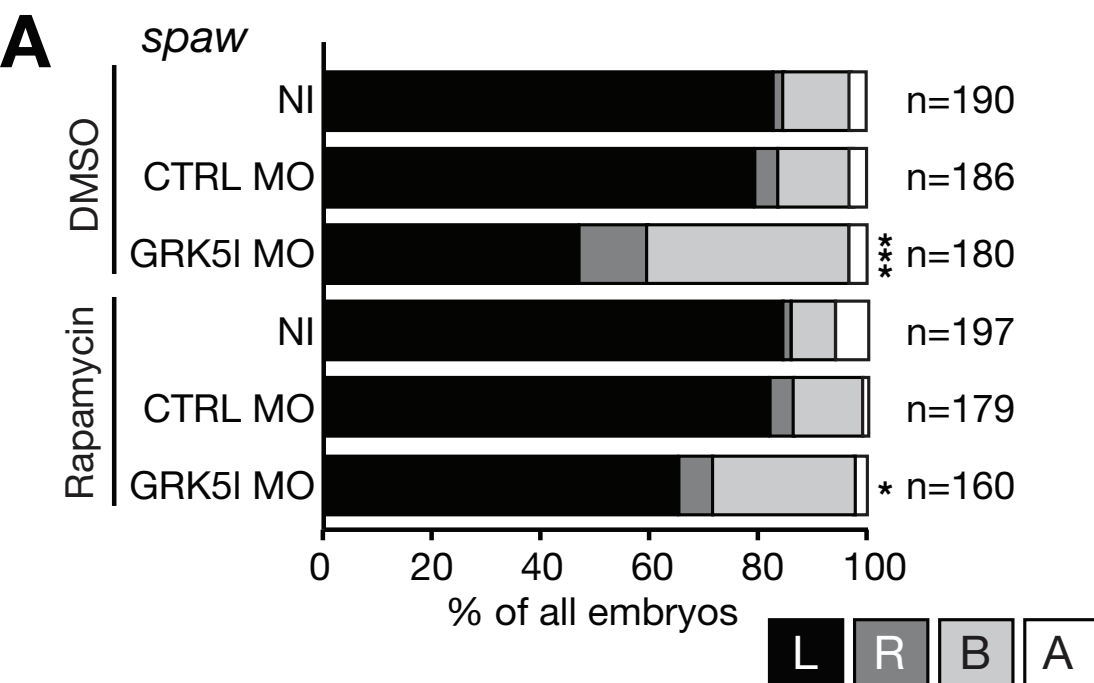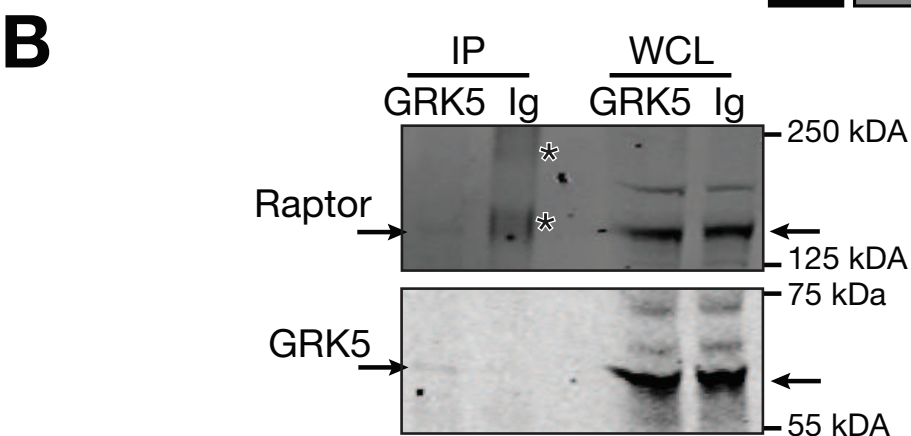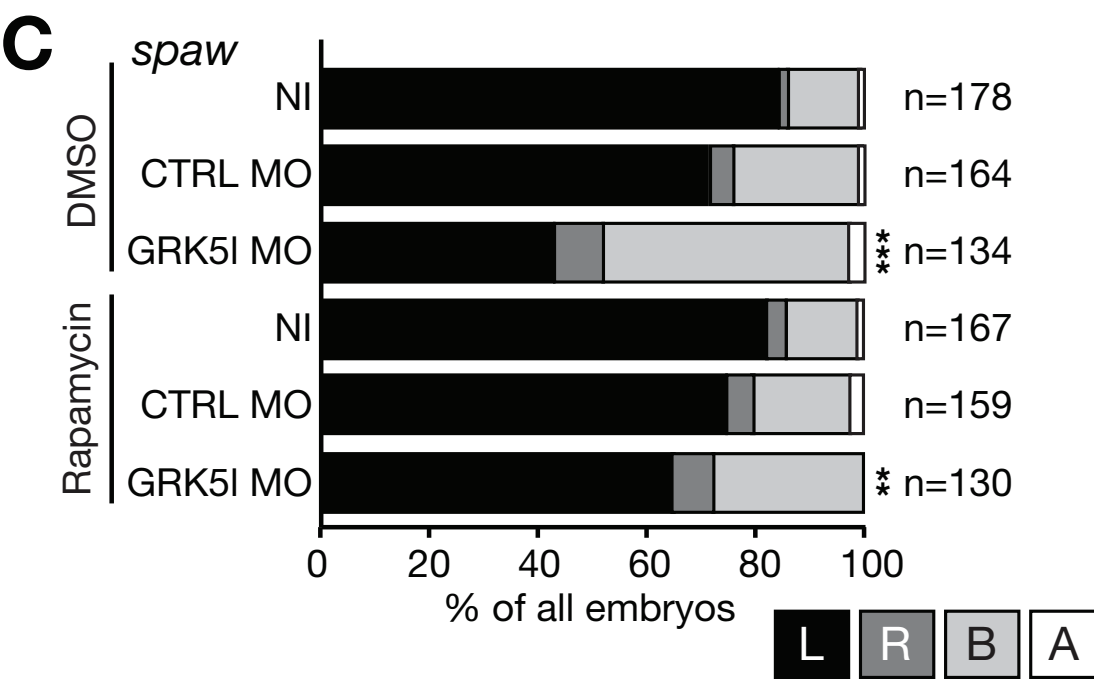

Supplement: NIHMS512455-supplement-02.pdf [file NIHMS512455-supplement-02.pdf]
